# Supplementary material for: The real-world pharmacovigilance study based on the FAERS database analyzed the adverse drug events associated with hydroxychloroquine
Source: Research Square preprint supplement (doi:10.21203/rs.3.rs-5951209/v1), 2025-03-24
Supplement: Supplementary file 1 [file 3e190b5fd377a79bbbd50ca2.docx]

Table 1. Four-grid table of disproportionality analysis method.

| **item** | **Target number of adverse reactions reported** | **Number of other adverse reactions reported** | **summation** |
| --- | --- | --- | --- |
| Target drug | a | b | a+b |
| Other drugs | c | d | c+d |
| **total** | a+c | b+d | N=a+b+c+d |

TABLE 2. Principle of disproportionality measure and standard of signal detection.

| Algorithms | Calculation Formula | Threshold |
| --- | --- | --- |
| ROR |  | a≥3 with a lower 95% CI > 1 |
| PRR |  | a≥3 with a lower 95% CI > 1 |
| BCPNN | α1=β1=1;α=β=2;γ11=1 | (-): E(IC)≤0  (+):0< E(IC) ≤1.5:  (++):1.5< E(IC) ≤3:  (+++):E(IC)>3 |
| MGPS |  | EBGM05>2,a>0 |

| SEX |  |
| --- | --- |
| F | 8772 (55.2%) |
| M | 3766 (23.7%) |
| Missing | 3355 (21.1%) |
| WT |  |
| ＜50 kg | 285 (1.8%) |
| ＞100 kg | 157 (1.0%) |
| 50～100 kg | 1243 (7.8%) |
| Missing | 14208 (89.4%) |
| AGE |  |
| <18Y | 521 (3.3%) |
| >85Y | 144 (0.9%) |
| 18～64.9Y | 6748 (42.5%) |
| 65～85Y | 2615 (16.5%) |
| Missing | 5865 (36.9%) |
| OCCP_COD |  |
| CN | 2847 (17.9%) |
| HP | 5488 (34.5%) |
| LW | 3 (0.0%) |
| MD | 3642 (22.9%) |
| OT | 2828 (17.8%) |
| PH | 485 (3.1%) |
| RN | 4 (0.0%) |
| Missing | 596 (3.8%) |
| OUTC_COD |  |
| CA | 71 (0.4%) |
| DE | 999 (6.3%) |
| DS | 336 (2.1%) |
| HO | 2980 (18.8%) |
| LT | 615 (3.9%) |
| OT | 8618 (54.2%) |
| RI | 25 (0.2%) |
| Missing | 2249 (14.2%) |
| REPORTER_  COUNTRY |  |
| UNITED STATES | 5881 (37.0%) |
| CANADA | 2431 (15.3%) |
| FRANCE | 1356 (8.5%) |
| SPAIN | 834 (5.2%) |
| ITALY | 799 (5.0%) |
| Missing | 2 (0.0%) |

Table 3. Basic information table

Table 4. Summary of Preferred Terms (PT) and System Organ Classes (SOC) that are positive according to all four algorithms: ROR, PRR, BCPNN, and MGPS.

| SOC | PT | a | ROR | IC025 | PRR | EBGM05 |
| --- | --- | --- | --- | --- | --- | --- |
| Blood And Lymphatic System Disorders | Leukopenia | 98 | 1.91 ( 1.57 - 2.33 ) | 0.93 ( 0.64 ) | 1.91 ( 42.61 ) | 1.91 ( 1.62 ) |
| Eosinophilia | 79 | 4.5 ( 3.61 - 5.62 ) | 2.16 ( 1.84 ) | 4.5 ( 213.91 ) | 4.48 ( 3.72 ) |
| Lymphadenopathy | 50 | 1.36 ( 1.03 - 1.8 ) | 0.45 ( 0.04 ) | 1.36 ( 4.83 ) | 1.36 ( 1.08 ) |
| Lymphopenia | 49 | 3.42 ( 2.58 - 4.53 ) | 1.77 ( 1.36 ) | 3.42 ( 83.48 ) | 3.41 ( 2.69 ) |
| Haemolytic Anaemia | 47 | 5.06 ( 3.8 - 6.74 ) | 2.33 ( 1.91 ) | 5.06 ( 152.13 ) | 5.03 ( 3.96 ) |
| Cardiac Disorders | Cardiomyopathy | 225 | 14.67 ( 12.86 - 16.74 ) | 3.85 ( 3.65 ) | 14.62 ( 2808.57 ) | 14.4 ( 12.89 ) |
| Cardiac Failure | 136 | 1.64 ( 1.38 - 1.94 ) | 0.71 ( 0.46 ) | 1.63 ( 33.51 ) | 1.63 ( 1.42 ) |
| Cardiotoxicity | 136 | 16.09 ( 13.58 - 19.07 ) | 3.98 ( 3.73 ) | 16.06 ( 1885.66 ) | 15.78 ( 13.69 ) |
| Cardiac Arrest | 128 | 1.48 ( 1.24 - 1.76 ) | 0.56 ( 0.31 ) | 1.48 ( 19.6 ) | 1.47 ( 1.28 ) |
| Ventricular Tachycardia | 116 | 6.79 ( 5.65 - 8.15 ) | 2.75 ( 2.48 ) | 6.78 ( 566.88 ) | 6.73 ( 5.78 ) |
| Congenital, Familial And Genetic Disorders | Hypertrophic Cardiomyopathy | 34 | 22.16 ( 15.77 - 31.15 ) | 4.43 ( 3.94 ) | 22.15 ( 669.38 ) | 21.62 ( 16.26 ) |
| Fabry's Disease | 14 | 97.11 ( 55.88 - 168.76 ) | 6.45 ( 5.66 ) | 97.09 ( 1196.3 ) | 87.34 ( 55 ) |
| Anterior Chamber Cleavage Syndrome | 10 | 204.77 ( 102.74 - 408.14 ) | 7.37 ( 6.42 ) | 204.74 ( 1637.56 ) | 165.56 ( 92.97 ) |
| Lipidosis | 9 | 175.92 ( 85.88 - 360.36 ) | 7.19 ( 6.2 ) | 175.89 ( 1299.3 ) | 146.19 ( 80.23 ) |
| Neonatal Lupus Erythematosus | 8 | 245.72 ( 111.99 - 539.14 ) | 7.58 ( 6.51 ) | 245.69 ( 1516.31 ) | 191.31 ( 99.13 ) |
| Ear And Labyrinth Disorders | Tinnitus | 74 | 1.56 ( 1.24 - 1.96 ) | 0.64 ( 0.3 ) | 1.56 ( 14.69 ) | 1.56 ( 1.28 ) |
| Deafness | 47 | 1.77 ( 1.33 - 2.36 ) | 0.82 ( 0.41 ) | 1.77 ( 15.78 ) | 1.77 ( 1.39 ) |
| Deafness Bilateral | 18 | 10.66 ( 6.7 - 16.97 ) | 3.4 ( 2.73 ) | 10.66 ( 155.64 ) | 10.54 ( 7.14 ) |
| Deafness Neurosensory | 17 | 5.25 ( 3.26 - 8.46 ) | 2.39 ( 1.7 ) | 5.25 ( 58.15 ) | 5.23 ( 3.51 ) |
| Deafness Unilateral | 17 | 3.03 ( 1.88 - 4.87 ) | 1.59 ( 0.91 ) | 3.03 ( 22.99 ) | 3.02 ( 2.03 ) |
| Endocrine Disorders | Cushingoid | 14 | 4.4 ( 2.6 - 7.44 ) | 2.13 ( 1.39 ) | 4.4 ( 36.62 ) | 4.38 ( 2.83 ) |
| Cushing's Syndrome | 9 | 2.15 ( 1.12 - 4.14 ) | 1.1 ( 0.19 ) | 2.15 ( 5.54 ) | 2.15 ( 1.24 ) |
| Hyperparathyroidism Primary | 3 | 8.3 ( 2.66 - 25.86 ) | 3.04 ( 1.59 ) | 8.29 ( 19.06 ) | 8.23 ( 3.18 ) |
| Eye Disorders | Retinopathy | 257 | 70.87 ( 62.39 - 80.51 ) | 6.03 ( 5.84 ) | 70.58 ( 16293.33 ) | 65.31 ( 58.7 ) |
| Visual Impairment | 206 | 1.68 ( 1.47 - 1.93 ) | 0.75 ( 0.54 ) | 1.68 ( 56.46 ) | 1.68 ( 1.5 ) |
| Maculopathy | 187 | 52.19 ( 45.02 - 60.51 ) | 5.62 ( 5.4 ) | 52.04 ( 8827.41 ) | 49.13 ( 43.41 ) |
| Retinal Toxicity | 177 | 222.51 ( 188.58 - 262.53 ) | 7.46 ( 7.23 ) | 221.87 ( 30936.58 ) | 176.57 ( 153.75 ) |
| Visual Field Defect | 121 | 16.07 ( 13.42 - 19.24 ) | 3.98 ( 3.71 ) | 16.04 ( 1675.02 ) | 15.76 ( 13.56 ) |
| Gastrointestinal Disorders | Abdominal Discomfort | 350 | 2.07 ( 1.86 - 2.3 ) | 1.04 ( 0.89 ) | 2.06 ( 191.39 ) | 2.06 ( 1.89 ) |
| Gastrointestinal Disorder | 180 | 2.16 ( 1.86 - 2.5 ) | 1.11 ( 0.89 ) | 2.16 ( 111.37 ) | 2.15 ( 1.9 ) |
| Glossodynia | 90 | 4.11 ( 3.34 - 5.05 ) | 2.03 ( 1.73 ) | 4.1 ( 210.37 ) | 4.09 ( 3.44 ) |
| Mouth Ulceration | 45 | 2.12 ( 1.58 - 2.84 ) | 1.08 ( 0.66 ) | 2.12 ( 26.52 ) | 2.12 ( 1.66 ) |
| Coeliac Disease | 30 | 3.06 ( 2.14 - 4.38 ) | 1.61 ( 1.09 ) | 3.06 ( 41.51 ) | 3.05 ( 2.26 ) |
| General Disorders And Administration Site Conditions | Condition Aggravated | 888 | 3.03 ( 2.84 - 3.24 ) | 1.58 ( 1.49 ) | 3 ( 1189.45 ) | 3 ( 2.84 ) |
| Drug Intolerance | 716 | 7.5 ( 6.97 - 8.08 ) | 2.88 ( 2.77 ) | 7.43 ( 3955.41 ) | 7.37 ( 6.93 ) |
| Treatment Failure | 497 | 6.23 ( 5.7 - 6.8 ) | 2.62 ( 2.49 ) | 6.18 ( 2147.37 ) | 6.15 ( 5.71 ) |
| Drug Interaction | 288 | 1.75 ( 1.56 - 1.96 ) | 0.8 ( 0.63 ) | 1.74 ( 91.37 ) | 1.74 ( 1.58 ) |
| Peripheral Swelling | 283 | 1.83 ( 1.63 - 2.05 ) | 0.87 ( 0.69 ) | 1.82 ( 105.32 ) | 1.82 ( 1.65 ) |
| Hepatobiliary Disorders | Hepatitis | 157 | 6.05 ( 5.17 - 7.08 ) | 2.59 ( 2.35 ) | 6.04 ( 655.5 ) | 6 ( 5.26 ) |
| Drug-Induced Liver Injury | 76 | 2.71 ( 2.17 - 3.4 ) | 1.44 ( 1.11 ) | 2.71 ( 81.85 ) | 2.71 ( 2.24 ) |
| Hepatotoxicity | 76 | 3.42 ( 2.73 - 4.29 ) | 1.77 ( 1.44 ) | 3.42 ( 129.74 ) | 3.41 ( 2.82 ) |
| Liver Disorder | 66 | 1.46 ( 1.15 - 1.86 ) | 0.55 ( 0.2 ) | 1.46 ( 9.68 ) | 1.46 ( 1.2 ) |
| Liver Injury | 66 | 3.07 ( 2.41 - 3.91 ) | 1.61 ( 1.26 ) | 3.07 ( 91.61 ) | 3.06 ( 2.5 ) |
| Immune System Disorders | Drug Hypersensitivity | 515 | 2.53 ( 2.32 - 2.76 ) | 1.33 ( 1.2 ) | 2.52 ( 470.45 ) | 2.51 ( 2.34 ) |
| Hypersensitivity | 329 | 1.73 ( 1.55 - 1.93 ) | 0.79 ( 0.63 ) | 1.73 ( 100.88 ) | 1.73 ( 1.58 ) |
| Anaphylactic Reaction | 72 | 1.34 ( 1.06 - 1.68 ) | 0.42 ( 0.08 ) | 1.34 ( 6.09 ) | 1.34 ( 1.1 ) |
| Haemophagocytic Lymphohistiocytosis | 35 | 5.91 ( 4.24 - 8.24 ) | 2.55 ( 2.07 ) | 5.91 ( 141.68 ) | 5.87 ( 4.45 ) |
| Immunodeficiency | 27 | 1.96 ( 1.35 - 2.87 ) | 0.97 ( 0.43 ) | 1.96 ( 12.75 ) | 1.96 ( 1.43 ) |
| Infections And Infestations | Infection | 184 | 1.28 ( 1.11 - 1.48 ) | 0.35 ( 0.14 ) | 1.28 ( 11.03 ) | 1.28 ( 1.13 ) |
| Herpes Zoster | 116 | 1.94 ( 1.62 - 2.33 ) | 0.96 ( 0.69 ) | 1.94 ( 52.9 ) | 1.94 ( 1.67 ) |
| Septic Shock | 85 | 1.96 ( 1.59 - 2.43 ) | 0.97 ( 0.66 ) | 1.96 ( 40.03 ) | 1.96 ( 1.64 ) |
| Lower Respiratory Tract Infection | 59 | 1.35 ( 1.05 - 1.75 ) | 0.43 ( 0.06 ) | 1.35 ( 5.39 ) | 1.35 ( 1.09 ) |
| Staphylococcal Infection | 49 | 1.4 ( 1.06 - 1.85 ) | 0.49 ( 0.08 ) | 1.4 ( 5.61 ) | 1.4 ( 1.11 ) |
| Injury, Poisoning And Procedural Complications | Toxicity To Various Agents | 506 | 3.05 ( 2.79 - 3.32 ) | 1.6 ( 1.47 ) | 3.03 ( 687.21 ) | 3.02 ( 2.81 ) |
| Intentional Overdose | 146 | 2.32 ( 1.97 - 2.73 ) | 1.21 ( 0.97 ) | 2.32 ( 109.1 ) | 2.31 ( 2.02 ) |
| Infusion Related Reaction | 85 | 1.32 ( 1.06 - 1.63 ) | 0.39 ( 0.08 ) | 1.31 ( 6.4 ) | 1.31 ( 1.1 ) |
| Wound | 62 | 2.3 ( 1.79 - 2.95 ) | 1.2 ( 0.83 ) | 2.3 ( 45.22 ) | 2.29 ( 1.86 ) |
| Retinal Injury | 27 | 34.77 ( 23.66 - 51.09 ) | 5.06 ( 4.51 ) | 34.76 ( 850.83 ) | 33.45 ( 24.24 ) |
| Investigations | Electrocardiogram Qt Prolonged | 579 | 16.19 ( 14.91 - 17.59 ) | 3.98 ( 3.86 ) | 16.05 ( 8027.54 ) | 15.78 ( 14.72 ) |
| Hepatic Enzyme Increased | 198 | 2.93 ( 2.55 - 3.37 ) | 1.55 ( 1.34 ) | 2.93 ( 250.37 ) | 2.92 ( 2.6 ) |
| C-Reactive Protein Increased | 157 | 4.28 ( 3.66 - 5.01 ) | 2.09 ( 1.86 ) | 4.27 ( 391.99 ) | 4.26 ( 3.73 ) |
| Red Blood Cell Sedimentation Rate Increased | 118 | 10.42 ( 8.69 - 12.5 ) | 3.36 ( 3.1 ) | 10.4 ( 990.95 ) | 10.29 ( 8.84 ) |
| C-Reactive Protein Abnormal | 118 | 21.13 ( 17.6 - 25.37 ) | 4.37 ( 4.1 ) | 21.1 ( 2204.98 ) | 20.61 ( 17.69 ) |
| Metabolism And Nutrition Disorders | Hypokalaemia | 199 | 4.26 ( 3.71 - 4.9 ) | 2.08 ( 1.88 ) | 4.25 ( 492.97 ) | 4.24 ( 3.77 ) |
| Hypoglycaemia | 104 | 2.05 ( 1.69 - 2.49 ) | 1.03 ( 0.75 ) | 2.05 ( 55.8 ) | 2.05 ( 1.74 ) |
| Phospholipidosis | 33 | 525.78 ( 340.95 - 810.81 ) | 8.35 ( 7.77 ) | 525.5 ( 10722.8 ) | 326.55 ( 227.28 ) |
| Hypocalcaemia | 31 | 1.62 ( 1.14 - 2.3 ) | 0.69 ( 0.18 ) | 1.62 ( 7.26 ) | 1.61 ( 1.2 ) |
| Hypercalcaemia | 21 | 1.65 ( 1.08 - 2.54 ) | 0.72 ( 0.11 ) | 1.65 ( 5.4 ) | 1.65 ( 1.15 ) |
| Musculoskeletal And Connective Tissue Disorders | Rheumatoid Arthritis | 1247 | 11.16 ( 10.55 - 11.81 ) | 3.44 ( 3.35 ) | 10.95 ( 11157.71 ) | 10.83 ( 10.33 ) |
| Arthralgia | 696 | 1.66 ( 1.54 - 1.79 ) | 0.72 ( 0.61 ) | 1.65 ( 180.69 ) | 1.65 ( 1.55 ) |
| Joint Swelling | 517 | 4.27 ( 3.91 - 4.66 ) | 2.08 ( 1.95 ) | 4.24 ( 1276.8 ) | 4.23 ( 3.93 ) |
| Synovitis | 281 | 16.24 ( 14.42 - 18.27 ) | 3.99 ( 3.82 ) | 16.17 ( 3925.41 ) | 15.89 ( 14.39 ) |
| Systemic Lupus Erythematosus | 267 | 8.29 ( 7.35 - 9.36 ) | 3.03 ( 2.86 ) | 8.26 ( 1688.74 ) | 8.19 ( 7.4 ) |
| Neoplasms Benign, Malignant And Unspecified (Incl Cysts And Polyps) | Myelodysplastic Syndrome | 29 | 1.91 ( 1.33 - 2.75 ) | 0.93 ( 0.4 ) | 1.91 ( 12.52 ) | 1.91 ( 1.41 ) |
| Meningioma | 13 | 3.88 ( 2.25 - 6.69 ) | 1.95 ( 1.18 ) | 3.88 ( 27.67 ) | 3.87 ( 2.45 ) |
| Non-Hodgkin's Lymphoma | 12 | 1.9 ( 1.08 - 3.35 ) | 0.93 ( 0.12 ) | 1.9 ( 5.12 ) | 1.9 ( 1.18 ) |
| Breast Cancer Stage Iii | 11 | 1.86 ( 1.03 - 3.36 ) | 0.9 ( 0.06 ) | 1.86 ( 4.38 ) | 1.86 ( 1.13 ) |
| Lymphoproliferative Disorder | 7 | 2.37 ( 1.13 - 4.98 ) | 1.24 ( 0.22 ) | 2.37 ( 5.53 ) | 2.37 ( 1.27 ) |
| Nervous System Disorders | Sciatica | 37 | 2.38 ( 1.72 - 3.29 ) | 1.25 ( 0.78 ) | 2.38 ( 29.54 ) | 2.38 ( 1.81 ) |
| Posterior Reversible Encephalopathy Syndrome | 35 | 3.79 ( 2.72 - 5.29 ) | 1.92 ( 1.44 ) | 3.79 ( 71.58 ) | 3.78 ( 2.86 ) |
| Myasthenia Gravis | 32 | 4.59 ( 3.24 - 6.5 ) | 2.19 ( 1.69 ) | 4.59 ( 89.34 ) | 4.57 ( 3.42 ) |
| Neuromyopathy | 32 | 29.7 ( 20.88 - 42.25 ) | 4.84 ( 4.33 ) | 29.68 ( 857.39 ) | 28.73 ( 21.39 ) |
| Fine Motor Skill Dysfunction | 16 | 5.63 ( 3.44 - 9.21 ) | 2.49 ( 1.78 ) | 5.63 ( 60.52 ) | 5.6 ( 3.71 ) |
| Pregnancy, Puerperium And Perinatal Conditions | Premature Delivery | 123 | 7.36 ( 6.16 - 8.79 ) | 2.87 ( 2.61 ) | 7.34 ( 668.54 ) | 7.29 ( 6.28 ) |
| Low Birth Weight Baby | 111 | 13.69 ( 11.35 - 16.52 ) | 3.75 ( 3.48 ) | 13.67 ( 1283.15 ) | 13.47 ( 11.51 ) |
| Abortion Spontaneous | 65 | 1.54 ( 1.21 - 1.96 ) | 0.62 ( 0.27 ) | 1.54 ( 12.24 ) | 1.54 ( 1.25 ) |
| Live Birth | 54 | 6.99 ( 5.35 - 9.13 ) | 2.79 ( 2.4 ) | 6.98 ( 274.61 ) | 6.93 ( 5.54 ) |
| Foetal Growth Restriction | 50 | 8.3 ( 6.28 - 10.97 ) | 3.04 ( 2.63 ) | 8.3 ( 317.77 ) | 8.23 ( 6.52 ) |
| Product Issues | Product Substitution Issue | 100 | 1.68 ( 1.38 - 2.05 ) | 0.75 ( 0.46 ) | 1.68 ( 27.58 ) | 1.68 ( 1.43 ) |
| Psychiatric Disorders | Suicide Attempt | 84 | 1.33 ( 1.08 - 1.65 ) | 0.41 ( 0.1 ) | 1.33 ( 6.98 ) | 1.33 ( 1.11 ) |
| Mental Status Changes | 52 | 1.8 ( 1.37 - 2.36 ) | 0.85 ( 0.45 ) | 1.8 ( 18.41 ) | 1.8 ( 1.43 ) |
| Delirium | 47 | 1.35 ( 1.01 - 1.8 ) | 0.43 ( 0.02 ) | 1.35 ( 4.28 ) | 1.35 ( 1.06 ) |
| Sleep Disorder Due To General Medical Condition, Insomnia Type | 22 | 3.95 ( 2.6 - 6 ) | 1.98 ( 1.37 ) | 3.95 ( 48.17 ) | 3.93 ( 2.77 ) |
| Fear Of Injection | 13 | 2.04 ( 1.18 - 3.51 ) | 1.03 ( 0.25 ) | 2.04 ( 6.86 ) | 2.04 ( 1.29 ) |
| Renal And Urinary Disorders | Acute Kidney Injury | 182 | 1.19 ( 1.03 - 1.38 ) | 0.25 ( 0.04 ) | 1.19 ( 5.67 ) | 1.19 ( 1.06 ) |
| Proteinuria | 54 | 2.88 ( 2.2 - 3.76 ) | 1.52 ( 1.13 ) | 2.88 ( 66 ) | 2.87 ( 2.3 ) |
| Lupus Nephritis | 50 | 31.94 ( 24.09 - 42.37 ) | 4.95 ( 4.53 ) | 31.92 ( 1443.98 ) | 30.81 ( 24.33 ) |
| Renal Phospholipidosis | 42 | 737.57 ( 488.4 - 1113.85 ) | 8.63 ( 8.1 ) | 737.07 ( 16623.86 ) | 397.34 ( 281.43 ) |
| Iga Nephropathy | 18 | 12.84 ( 8.06 - 20.45 ) | 3.66 ( 3 ) | 12.83 ( 193.54 ) | 12.66 ( 8.58 ) |
| Respiratory, Thoracic And Mediastinal Disorders | Respiratory Failure | 137 | 1.81 ( 1.53 - 2.14 ) | 0.85 ( 0.6 ) | 1.81 ( 49.19 ) | 1.8 ( 1.57 ) |
| Interstitial Lung Disease | 116 | 2.39 ( 1.99 - 2.87 ) | 1.25 ( 0.99 ) | 2.39 ( 93.37 ) | 2.38 ( 2.05 ) |
| Pulmonary Fibrosis | 76 | 4.04 ( 3.22 - 5.06 ) | 2.01 ( 1.68 ) | 4.04 ( 172.85 ) | 4.02 ( 3.33 ) |
| Acute Respiratory Distress Syndrome | 71 | 3.89 ( 3.08 - 4.91 ) | 1.95 ( 1.61 ) | 3.89 ( 151.51 ) | 3.87 ( 3.19 ) |
| Lung Disorder | 68 | 1.38 ( 1.08 - 1.75 ) | 0.46 ( 0.11 ) | 1.38 ( 6.98 ) | 1.38 ( 1.13 ) |
| Skin And Subcutaneous Tissue Disorders | Rash | 654 | 1.51 ( 1.4 - 1.63 ) | 0.59 ( 0.48 ) | 1.51 ( 112.39 ) | 1.51 ( 1.41 ) |
| Alopecia | 345 | 1.68 ( 1.51 - 1.87 ) | 0.75 ( 0.59 ) | 1.68 ( 94.59 ) | 1.68 ( 1.53 ) |
| Acute Generalised Exanthematous Pustulosis | 148 | 19.23 ( 16.34 - 22.64 ) | 4.23 ( 3.99 ) | 19.19 ( 2496.01 ) | 18.79 ( 16.39 ) |
| Drug Eruption | 113 | 6.46 ( 5.37 - 7.77 ) | 2.68 ( 2.41 ) | 6.45 ( 516.37 ) | 6.41 ( 5.49 ) |
| Drug Reaction With Eosinophilia And Systemic Symptoms | 111 | 4.46 ( 3.7 - 5.38 ) | 2.15 ( 1.88 ) | 4.46 ( 296.15 ) | 4.44 ( 3.8 ) |
| Social Circumstances | Loss Of Personal Independence In Daily Activities | 179 | 3.98 ( 3.43 - 4.61 ) | 1.98 ( 1.77 ) | 3.97 ( 395.65 ) | 3.95 ( 3.5 ) |
| Impaired Work Ability | 71 | 3.14 ( 2.48 - 3.96 ) | 1.64 ( 1.3 ) | 3.13 ( 102.83 ) | 3.13 ( 2.57 ) |
| Disability | 50 | 2.47 ( 1.87 - 3.26 ) | 1.3 ( 0.9 ) | 2.47 ( 43.7 ) | 2.47 ( 1.96 ) |
| Immobile | 15 | 3.4 ( 2.05 - 5.65 ) | 1.76 ( 1.04 ) | 3.4 ( 25.32 ) | 3.39 ( 2.22 ) |
| Wheelchair User | 15 | 3.26 ( 1.96 - 5.41 ) | 1.7 ( 0.98 ) | 3.26 ( 23.41 ) | 3.25 ( 2.13 ) |
| Surgical And Medical Procedures | Knee Arthroplasty | 63 | 3.12 ( 2.44 - 4 ) | 1.64 ( 1.28 ) | 3.12 ( 90.3 ) | 3.11 ( 2.53 ) |
| Hip Arthroplasty | 46 | 3.1 ( 2.32 - 4.14 ) | 1.63 ( 1.21 ) | 3.1 ( 65.08 ) | 3.09 ( 2.42 ) |
| Abortion Induced | 20 | 1.99 ( 1.28 - 3.09 ) | 0.99 ( 0.36 ) | 1.99 ( 9.84 ) | 1.99 ( 1.38 ) |
| Foot Operation | 16 | 3.28 ( 2.01 - 5.36 ) | 1.71 ( 1.01 ) | 3.28 ( 25.28 ) | 3.27 ( 2.17 ) |
| Shoulder Arthroplasty | 13 | 5.23 ( 3.03 - 9.02 ) | 2.38 ( 1.6 ) | 5.23 ( 44.16 ) | 5.2 ( 3.3 ) |
| Vascular Disorders | Shock | 39 | 1.7 ( 1.24 - 2.33 ) | 0.76 ( 0.31 ) | 1.7 ( 11.23 ) | 1.7 ( 1.31 ) |
| Vasculitis | 19 | 1.58 ( 1.01 - 2.48 ) | 0.66 ( 0.01 ) | 1.58 ( 4.02 ) | 1.58 ( 1.08 ) |
| Haemodynamic Instability | 16 | 2.16 ( 1.32 - 3.53 ) | 1.11 ( 0.41 ) | 2.16 ( 9.93 ) | 2.16 ( 1.43 ) |
| Peripheral Venous Disease | 13 | 4.24 ( 2.46 - 7.32 ) | 2.08 ( 1.31 ) | 4.24 ( 32.08 ) | 4.23 ( 2.68 ) |
| Bloody Discharge | 10 | 8.47 ( 4.54 - 15.8 ) | 3.07 ( 2.2 ) | 8.47 ( 65.26 ) | 8.4 ( 4.99 ) |
